# Supplementary material
Source: PubMed Central journal article supplement (PMC3715591)
Supplement: NIHMS477254-supplement-1.pdf [file NIHMS477254-supplement-1.pdf]

## Supplementary Table 1. Primer sequences.

| Genes                      | Forward                         | Reverse                        |
|----------------------------|---------------------------------|--------------------------------|
| <b>Mouse Il6</b>           | 5'-TAGTCCTTCTACGCGAATTTCC-3'    | 5'-TTGGTCCTTAGCCACTGCTTC-3'    |
| <b>Mouse Mmp3</b>          | 5'-ACATGGAGACTTTGTCCCTTTTG-3'   | 5'-TTGGCTGAGTGGTAGAGTCCC-3'    |
| <b>Mouse Mmp13</b>         | 5'-CTTCTTCTTGTTGAGCTGGACTC-3'   | 5'-CTGTGGAGGTCAGTGTAGACT-3'    |
| <b>Mouse Pai1</b>          | 5'-TCATCAATGACTGGGTGGAA-3'      | 5'-CTGCTCTTGGTCGGAAAGAC-3'     |
| <b>Mouse Igfbp2</b>        | 5'-CCTCAAGTCAGGCATGAAGGA-3'     | 5'-GCAGGGAGTAGAGATGTTCCA-3'    |
| <b>GAPDH</b>               | 5'-AGGTCCGGTGTGAACGGATTTG-3'    | 5'-TGTAGACCATGTAGTTGAGGTCA-3'  |
| <b>Human BRAF</b>          | 5'-CAGTGCTACCTTCATCTCTTTTCAG-3' | 5'-GACTGTAACTCCACACCTTGCA-3'   |
| <b>Mouse Xpc</b>           | 5'-TCCAGGGGACCCCAAAAT-3'        | 5'-GCTTTTTGGGTGTTTCTTTGCC-3'   |
| <b>Human XPC</b>           | 5'-CTTCGGAGGGCGATGAAAC-3'       | 5'-TTGAGAGGTAGTAGGTGTCCAC-3'   |
| <b>Human actin</b>         | 5'-AGCGAGCATCCCCCAAAGTT-3'      | 5'-GGGCACGAAGGCTCATCATT-3'     |
| <b>Mouse Xpc gDNA</b>      | 5'-AACCTTAGGCCGCCACGCAC-3'      | 5'-TTCCTCGGGACTACCGCGCA-3'     |
| <b>Human XPC gDNA</b>      | 5'-GCTTCCCGCAGTTTTTTA-3'        | 5'-GTTGCTTGTCTGGGCAAATTCCAC-3' |
| <b>Control primer gDNA</b> | 5'-AAGAACGCCAAGGACAAGAA-3'      | 5'-TCATTGTTGAGGTGCGTGAT-3'     |
