# Supplementary material
Source: PubMed Central journal article supplement (PMC3715591)
Supplement: NIHMS477254-supplement-2.pdf [file NIHMS477254-supplement-2.pdf]

Supplementary Figure 1

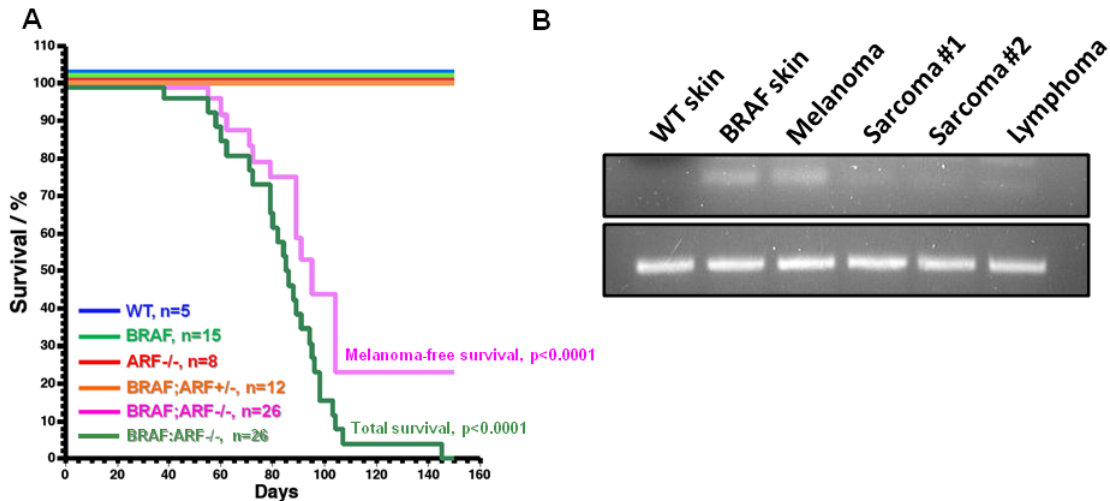

**Supplementary Figure 1.**

**(A)** Kaplan-Meier curve depicting melanoma-free survival of mice whose overall survival is presented in Figure 1B. Total survival of the same cohort of BRAF<sup>V600E</sup>;ARF<sup>-/-</sup> mice is also shown in dark green so as to provide direct comparison between total survival and melanoma-free survival.

**(B)** RT-PCR detecting the expression of the BRAF<sup>V600E</sup> transgene in two sarcoma and one splenic lymphoma tissue harvested from BRAF<sup>V600E</sup>;ARF<sup>-/-</sup> mice. Primers specific for human BRAF gene were used (Supplementary Table 1). Skin RNAs from WT and BRAF<sup>V600E</sup> mice were used as negative and positive controls, respectively.
