# Supplementary material
Source: PubMed Central journal article supplement (PMC3715591)
Supplement: NIHMS477254-supplement-3.pdf [file NIHMS477254-supplement-3.pdf]

## Supplementary Figure 2

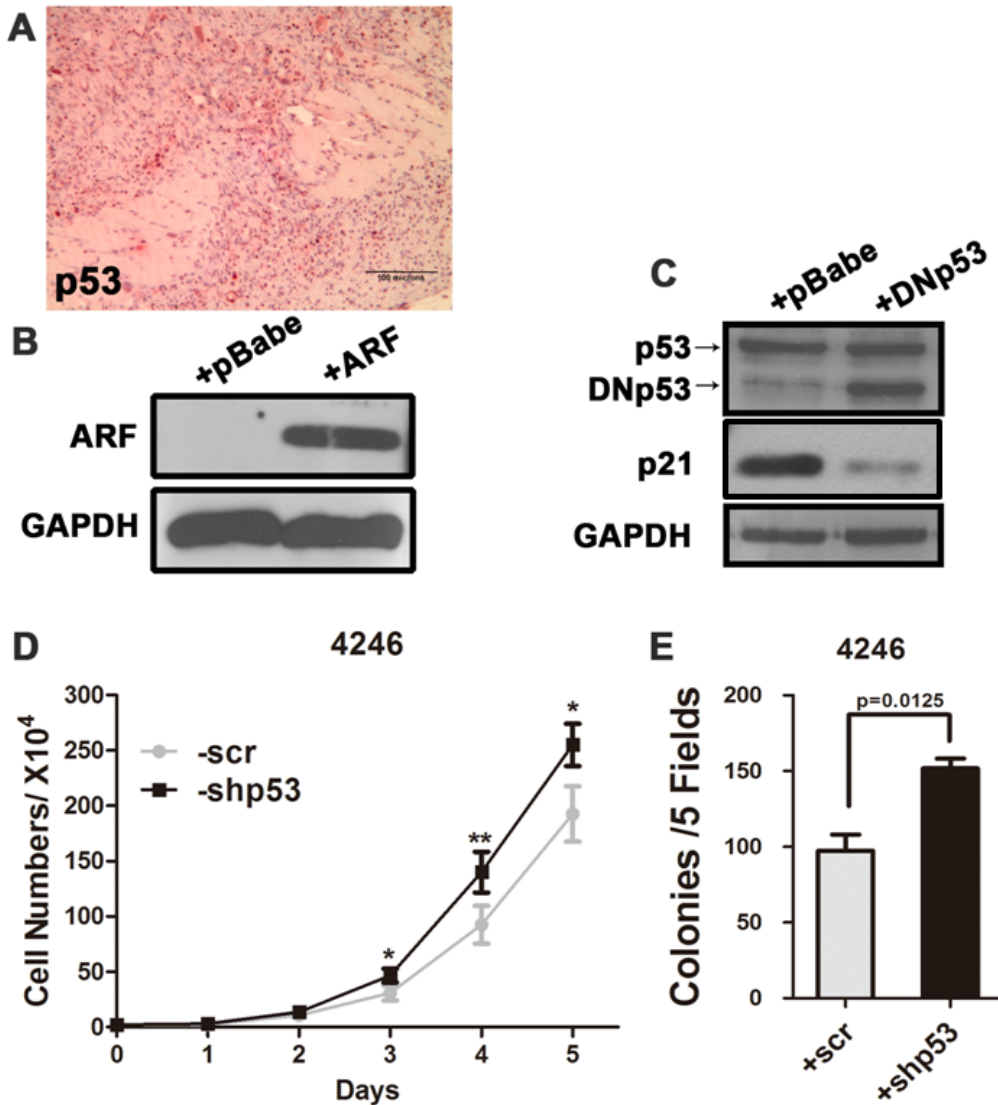

### Supplementary Figure 2.

(A) Immunohistochemical staining of p53 in representative BRAF<sup>V600E</sup>;ARF<sup>-/-</sup> tumor section (20X).

(B) Immunoblot for p19<sup>ARF</sup> shows restoration of ARF in primary BRAF<sup>V600E</sup>;ARF<sup>-/-</sup> mouse melanoma cell line.

(C) Immunoblot indicates the expression of dominant-negative p53 (DNp53) and p21. Upon DNp53 expression, the induction of p21, a downstream target of p53, was impaired.

(D-E) Growth curve and soft agar colony-formation ability of BRAF<sup>V600E</sup>;ARF<sup>-/-</sup> primary melanoma cells. Cells (#4246) with shp53 grew faster (D) and formed more colonies (E) than control. Colonies that were bigger than 30µm were quantified. Student t-test, \* p < 0.05, \*\* p < 0.005.
