# Supplementary material
Source: PubMed Central journal article supplement (PMC3715591)
Supplement: NIHMS477254-supplement-4.pdf [file NIHMS477254-supplement-4.pdf]

## Supplementary Figure 3

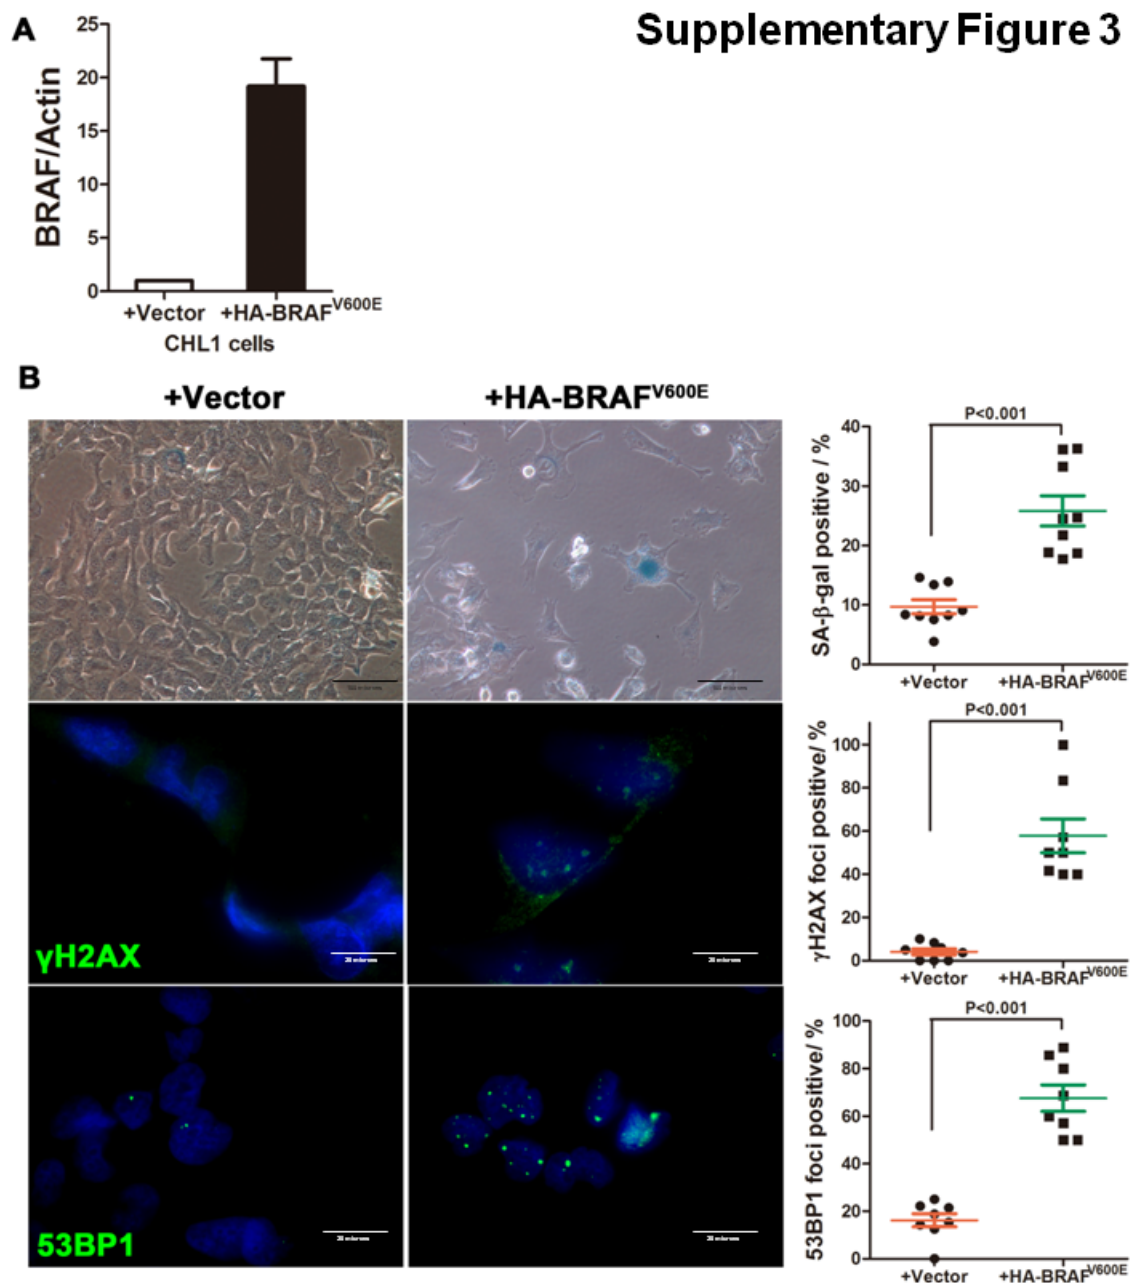

### Supplementary Figure 3.

(A) Real-time quantitative PCR of CHL1 cells infected with empty vector or HA-BRAF<sup>V600E</sup> virus to show the expression of exogenous BRAF<sup>V600E</sup>.

(B) Acute expression of BRAF<sup>V600E</sup> in BRAF wild-type melanoma cells caused senescence and DNA damage response. SA-β-gal staining,  $\gamma$ H2AX and 53BP1 immunofluorescence staining were performed on the CHL1 cells with or without BRAF<sup>V600E</sup> addition. Quantification of SA-β-gal-,  $\gamma$ H2AX- and 53BP1-positive cells is shown at the right.
